# Supplementary material
Source: Springer Nature journal article supplement (https://www.springermedizin.de/resource/supplementary/12955_2007_413_MOESM1_ESM.pdf/9560370)

### All Patients (n = 356)

$r=0.82, p<0.001$

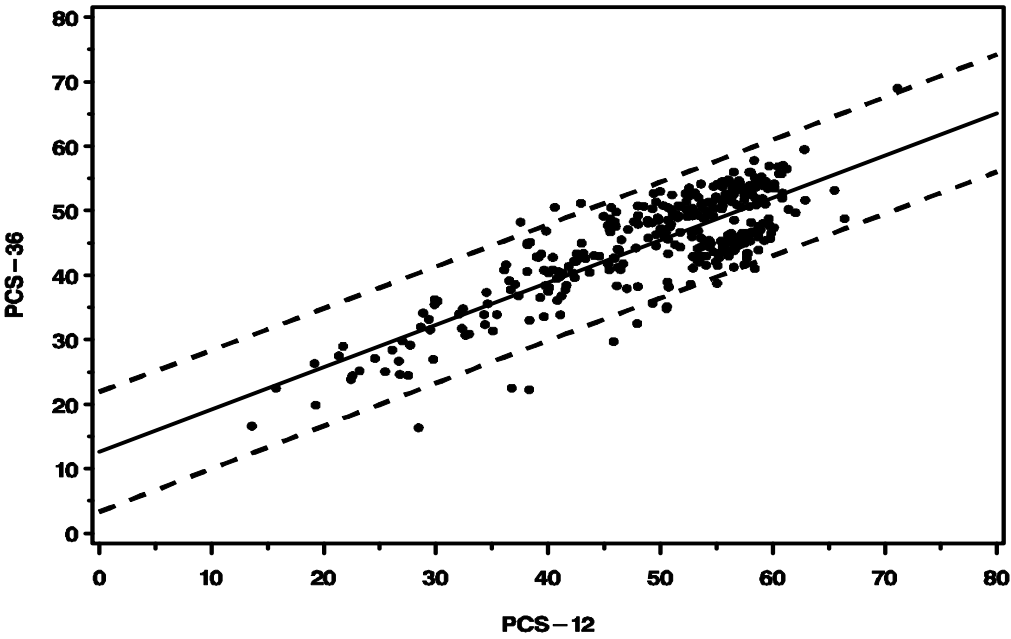

### Normal Weight Patients (n = 139)

$r=0.75, p<0.001$

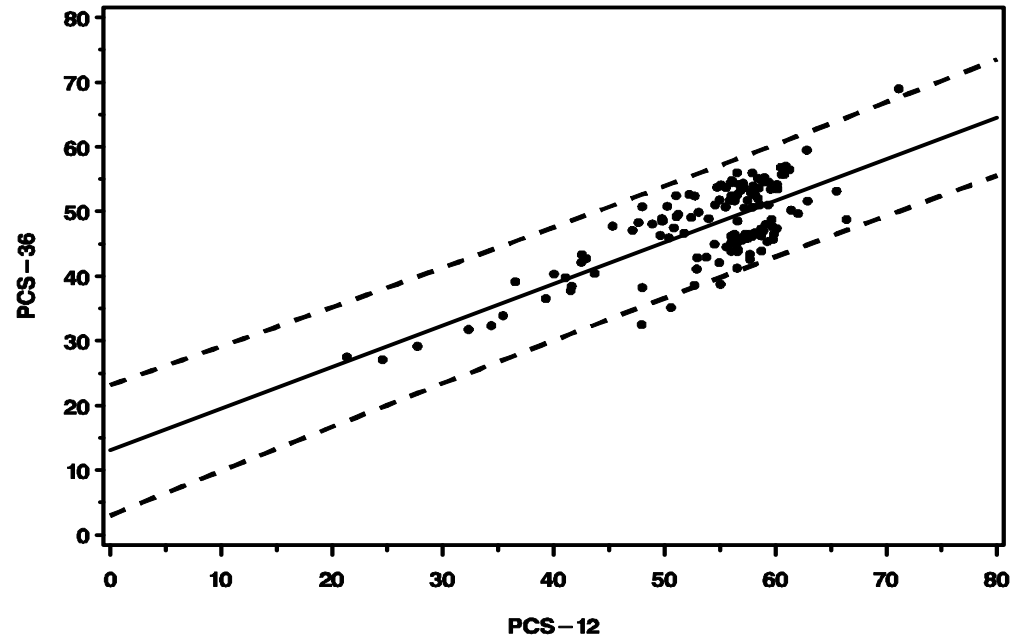

### Overweight Patients (n = 119)

$r=0.73, p<0.001$

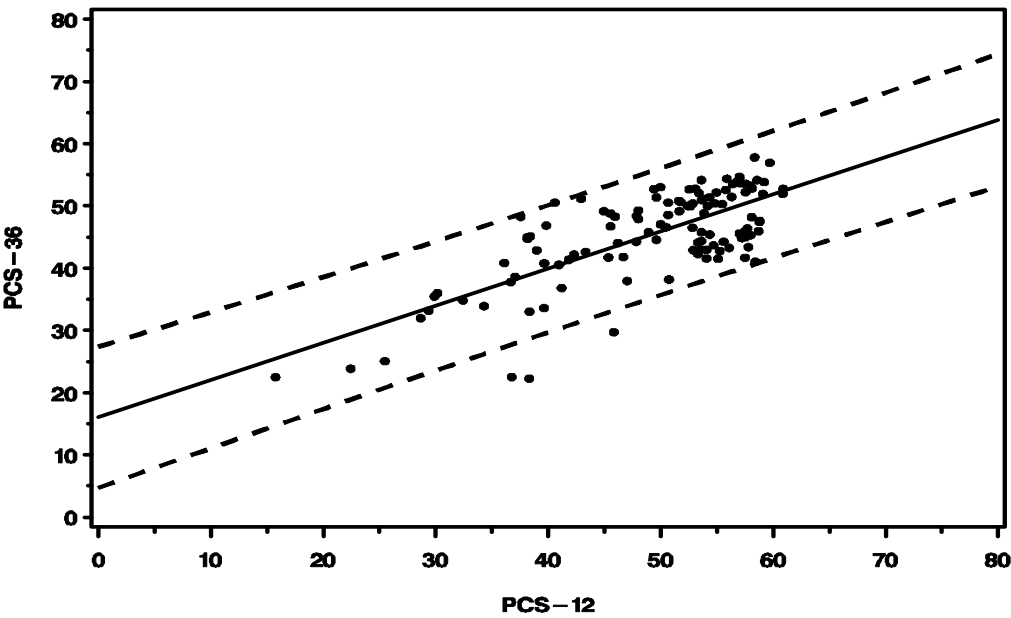

### Obese Patients (n = 98)

$r=0.89, p<0.001$

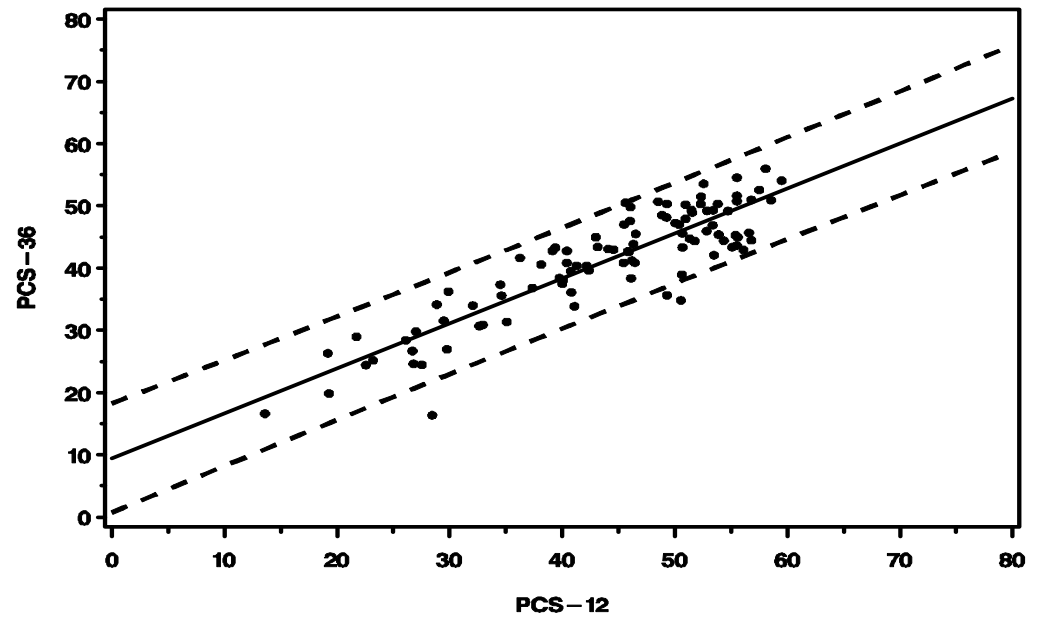

Supplement: MOESM1 [file 9560370]
